# Supplementary figures and images for: Mapping transiently formed and sparsely populated conformations on a complex energy landscape
Source: eLife journal article supplement (doi:10.7554/elife.17505), 2016-08-23

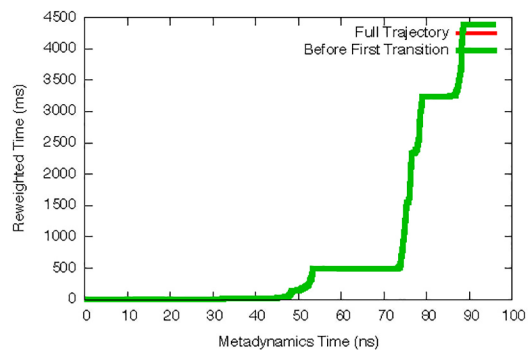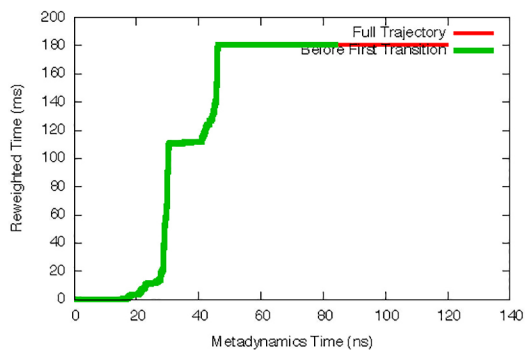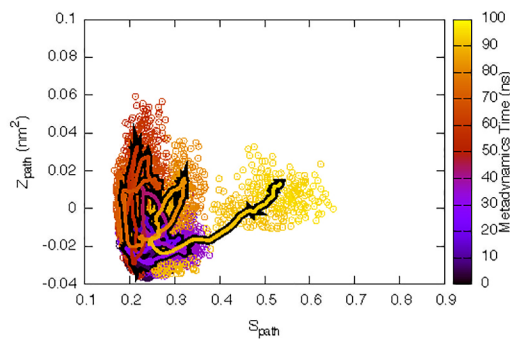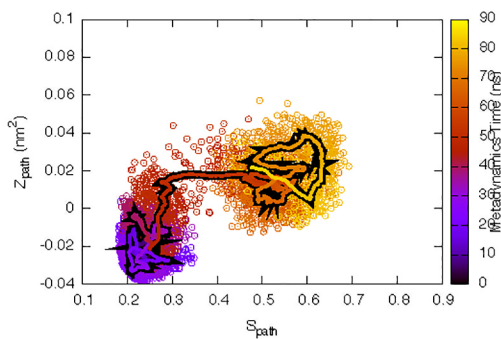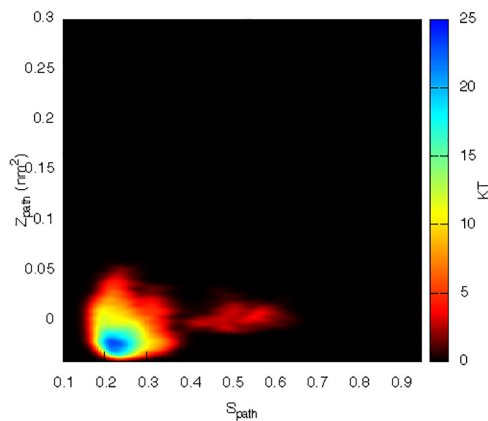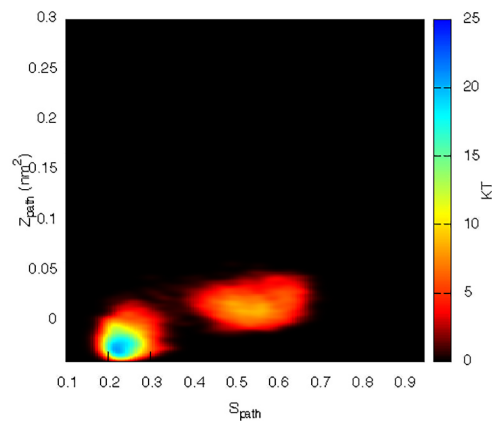

(A) example 1

(B) example 2

Supplement: supp [file elife_poa_e17505_Appendix_1_figure_1.pdf › elife_poa_e17505_Appendix_1_figure_1.pdf]

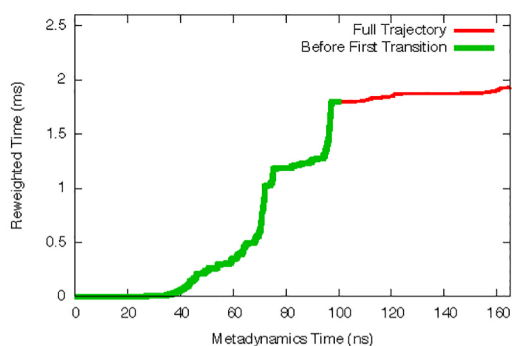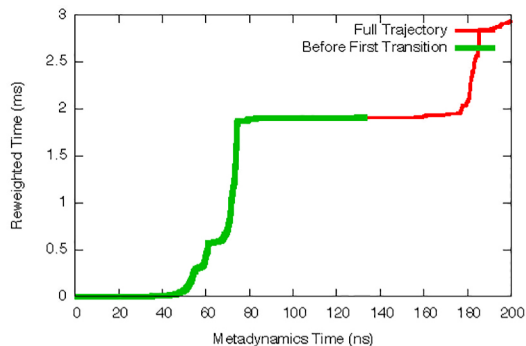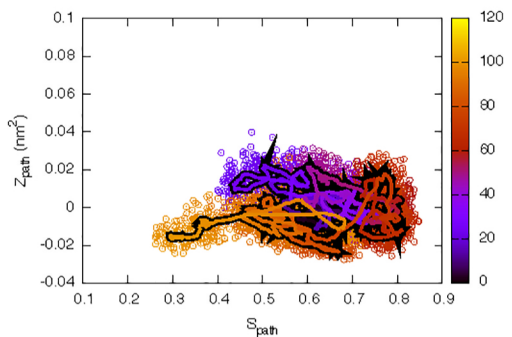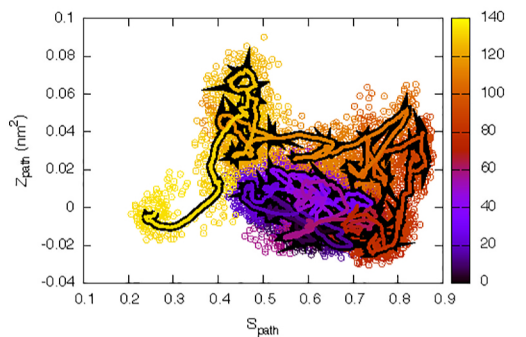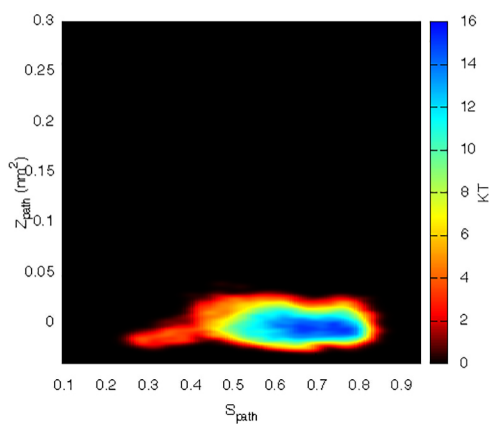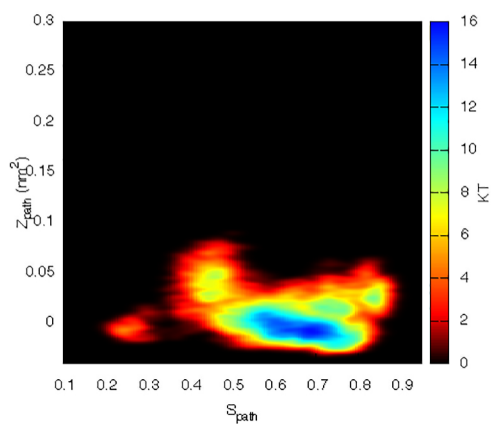

(A) example 1

(B) example 2

Supplement: supp [file elife_poa_e17505_Appendix_1_figure_2.pdf › elife_poa_e17505_Appendix_1_figure_2.pdf]

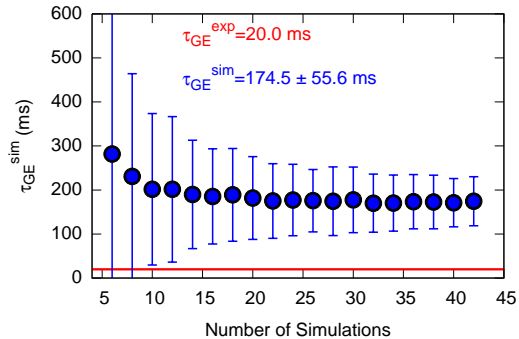

(A)  $G \rightarrow E$

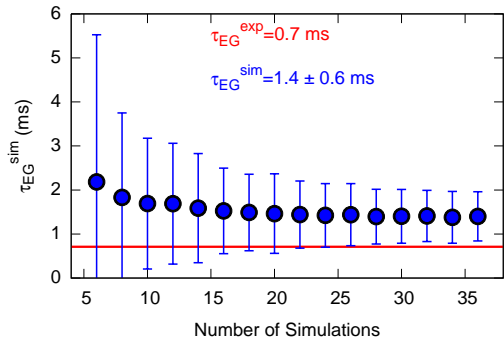

(B)  $E \rightarrow G$

Supplement: supp [file elife_poa_e17505_Appendix_1_figure_3.pdf › elife_poa_e17505_Appendix_1_figure_3.pdf]

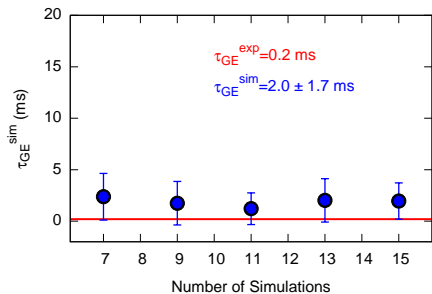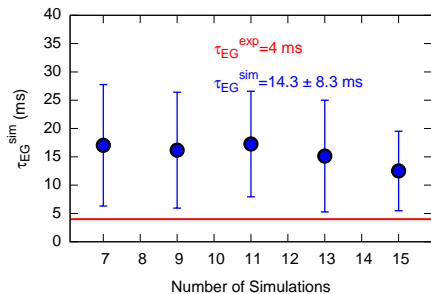

Supplement: supp [file elife_poa_e17505_Appendix_1_figure_4.pdf › elife_poa_e17505_Appendix_1_figure_4.pdf]

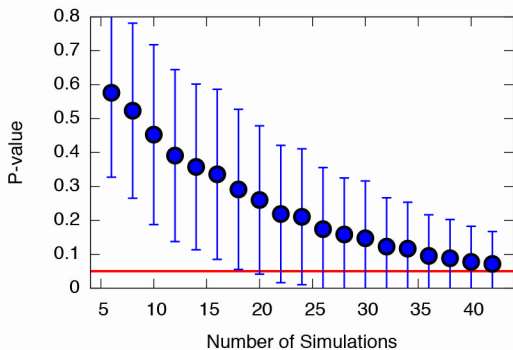

(A)  $G \rightarrow E$

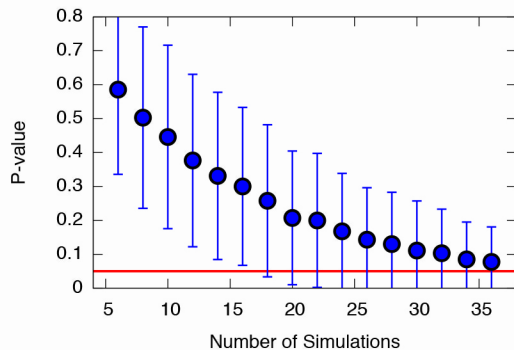

(B)  $E \rightarrow G$

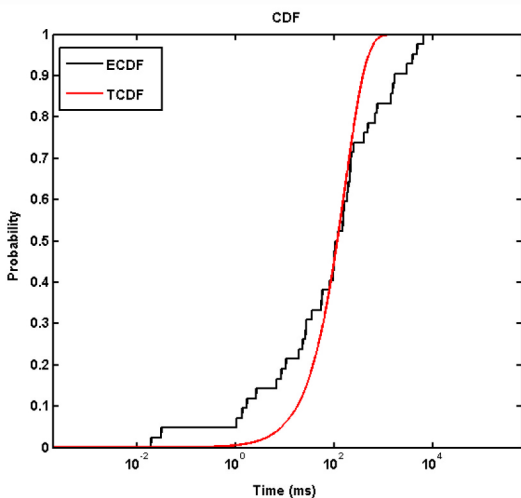

(C)  $G \rightarrow E$

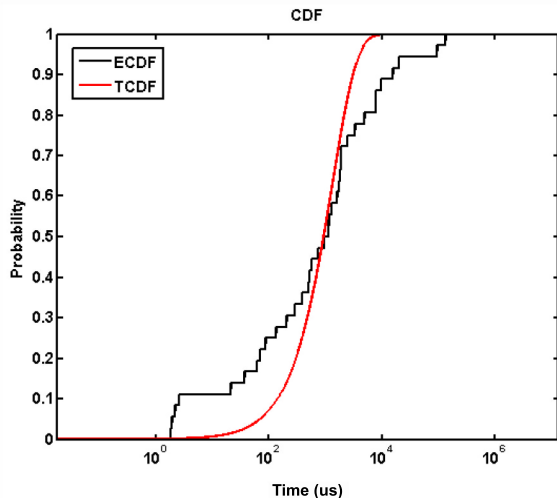

(D)  $E \rightarrow G$

Supplement: supp [file elife_poa_e17505_Appendix_1_figure_5.pdf › elife_poa_e17505_Appendix_1_figure_5.pdf]

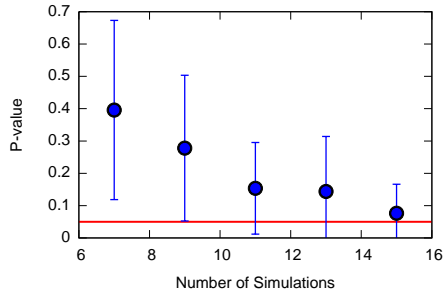

(A)  $G \rightarrow E$

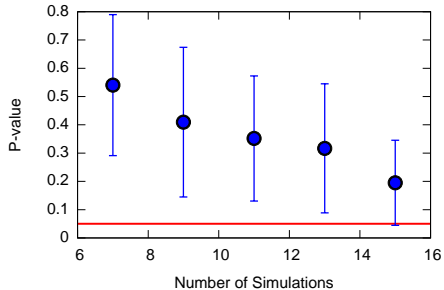

(B)  $E \rightarrow G$

Supplement: supp [file elife_poa_e17505_Appendix_1_figure_6.pdf › elife_poa_e17505_Appendix_1_figure_6.pdf]

RMSD matrix for steepest descent path

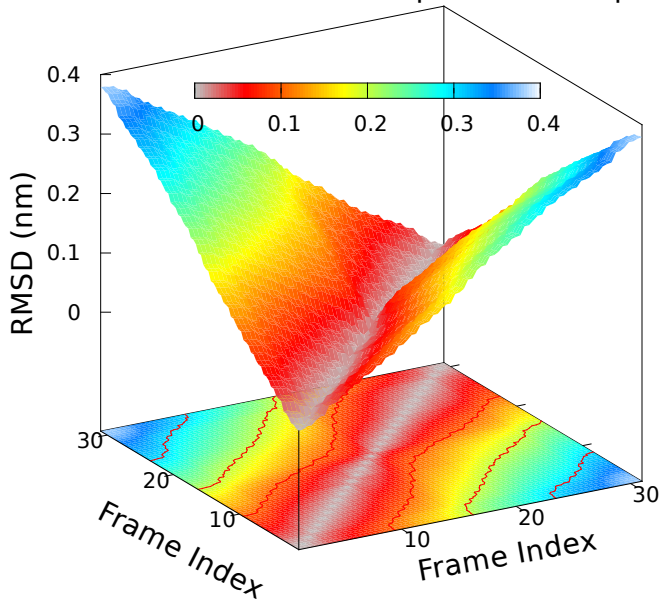

Supplement: supp [file elife_poa_e17505_Figure_2_figure_supplement_1.pdf › elife_poa_e17505_Figure_2_figure_supplement_1.pdf]

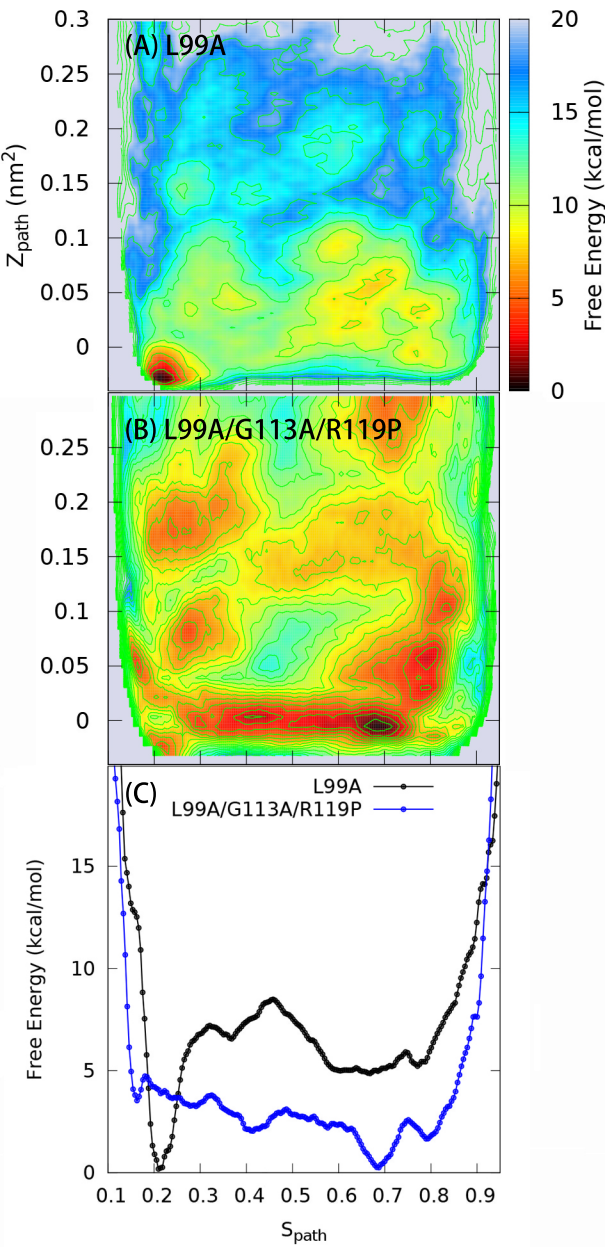

Supplement: supp [file elife_poa_e17505_Figure_2_figure_supplement_2.pdf › elife_poa_e17505_Figure_2_figure_supplement_2.pdf]

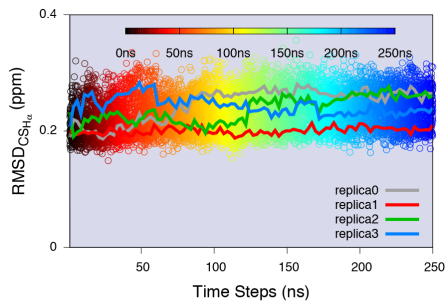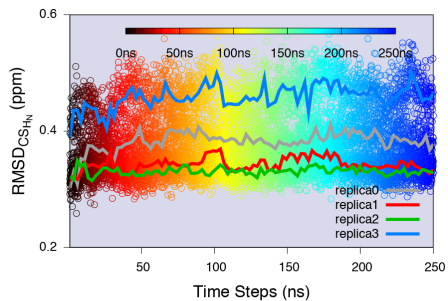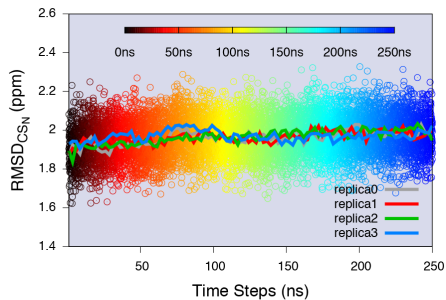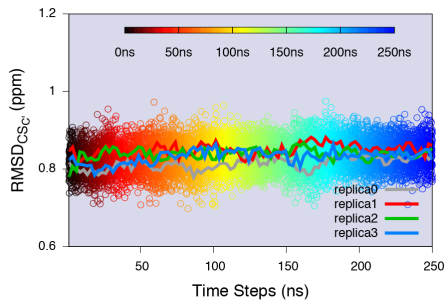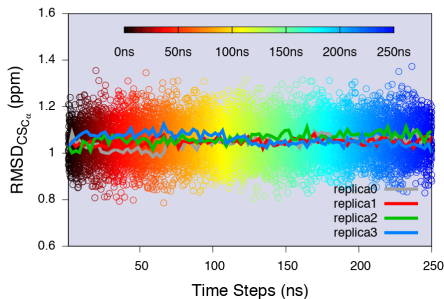

Supplement: supp [file elife_poa_e17505_Figure_4_figure_supplement_1.pdf › elife_poa_e17505_Figure_4_figure_supplement_1.pdf]

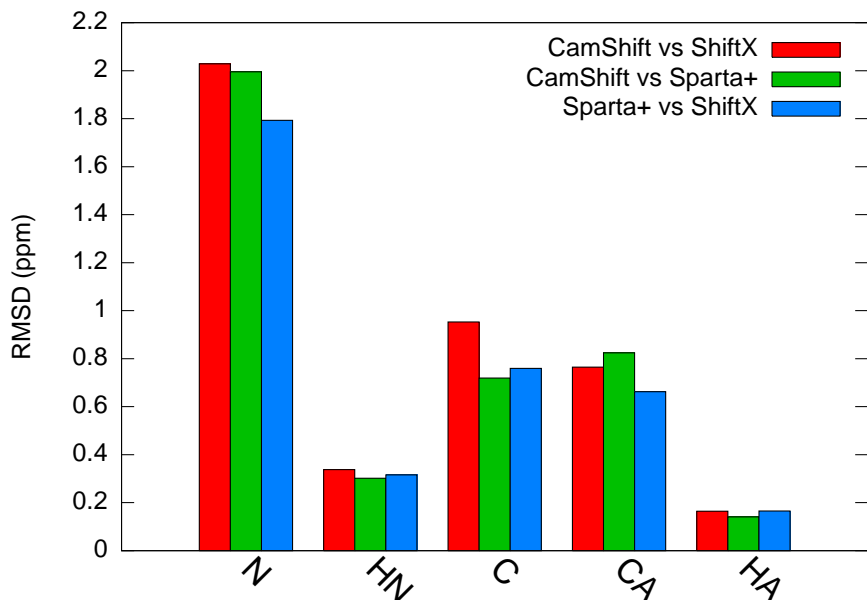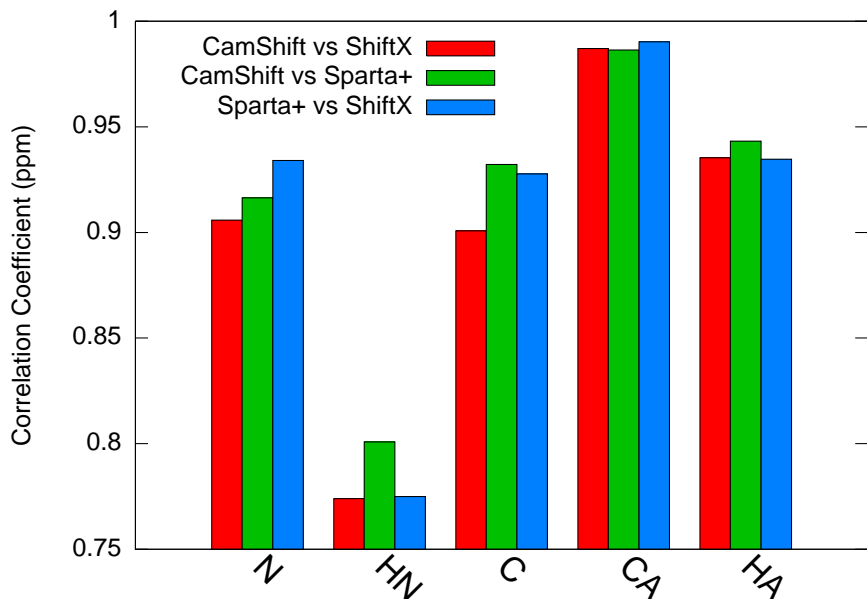

Supplement: supp [file elife_poa_e17505_Figure_4_figure_supplement_2.pdf › elife_poa_e17505_Figure_4_figure_supplement_2.pdf]

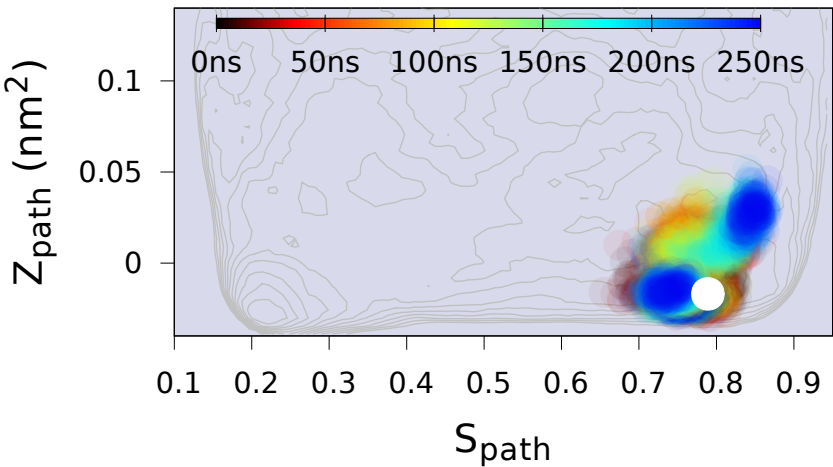

(A) CHARMM22\*

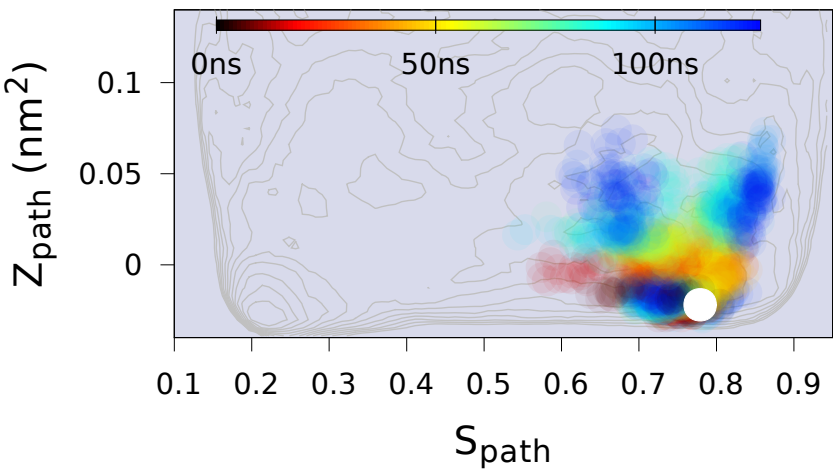

(B) AMBER99sb\*-ILDN

Supplement: supp [file elife_poa_e17505_Figure_4_figure_supplement_3.pdf › elife_poa_e17505_Figure_4_figure_supplement_3.pdf]

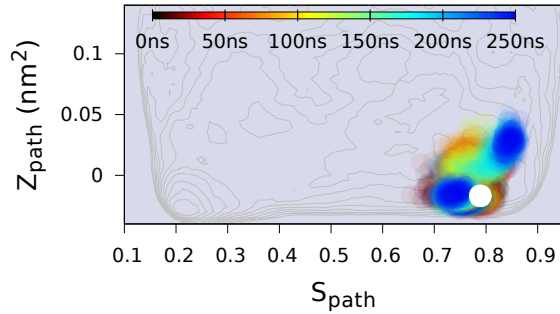

(A) CHARMM22\*, 4 replica,  $\epsilon_{CS} = 24$

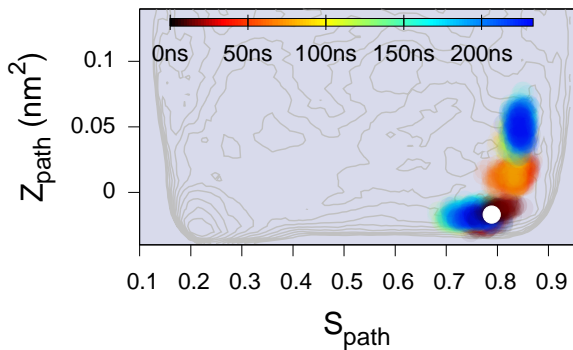

(B) CHARMM22\*, 2 replica,  $\epsilon_{CS} = 24$

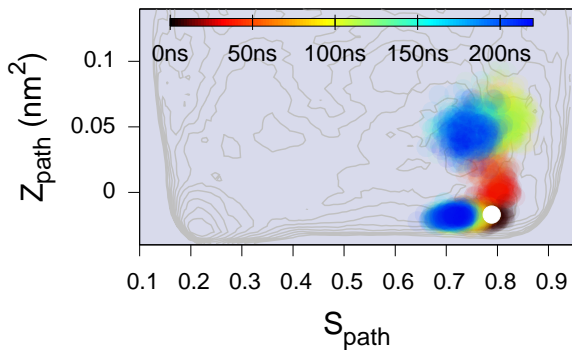

(C) CHARMM22\*, 2 replica,  $\epsilon_{CS} = 12$

Supplement: supp [file elife_poa_e17505_Figure_4_figure_supplement_4.pdf › elife_poa_e17505_Figure_4_figure_supplement_4.pdf]

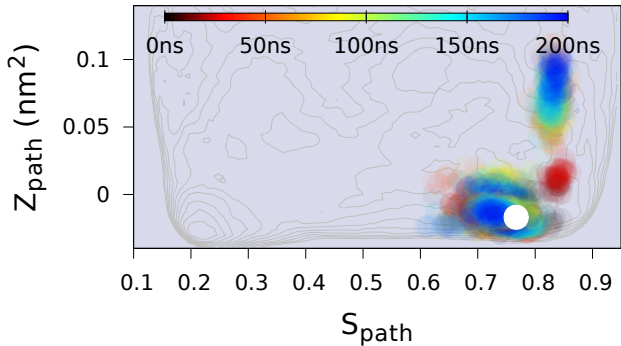

Supplement: supp [file elife_poa_e17505_Figure_4_figure_supplement_5.pdf › elife_poa_e17505_Figure_4_figure_supplement_5.pdf]

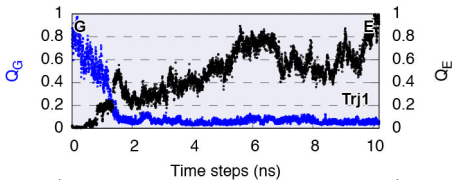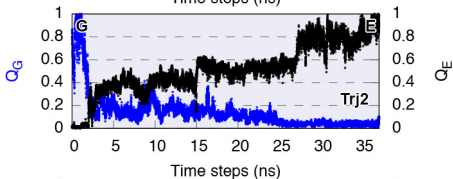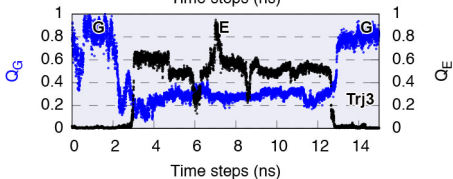

Supplement: supp [file elife_poa_e17505_Figure_5_figure_supplement_1.pdf › elife_poa_e17505_Figure_5_figure_supplement_1.pdf]

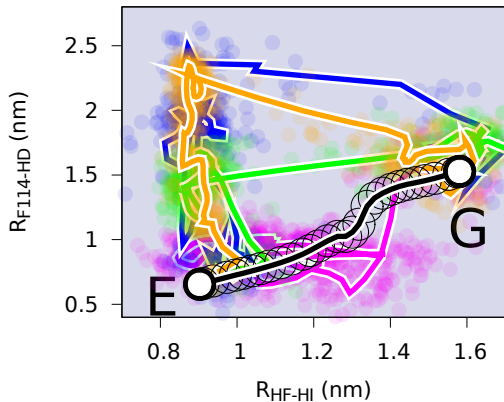

Trj1,G->E  
Trj2,G->E  
Trj3,G->E  
Trj3,E->G  
SDP,G->E

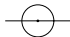

Supplement: supp [file elife_poa_e17505_Figure_5_figure_supplement_2.pdf › elife_poa_e17505_Figure_5_figure_supplement_2.pdf]

**(A)**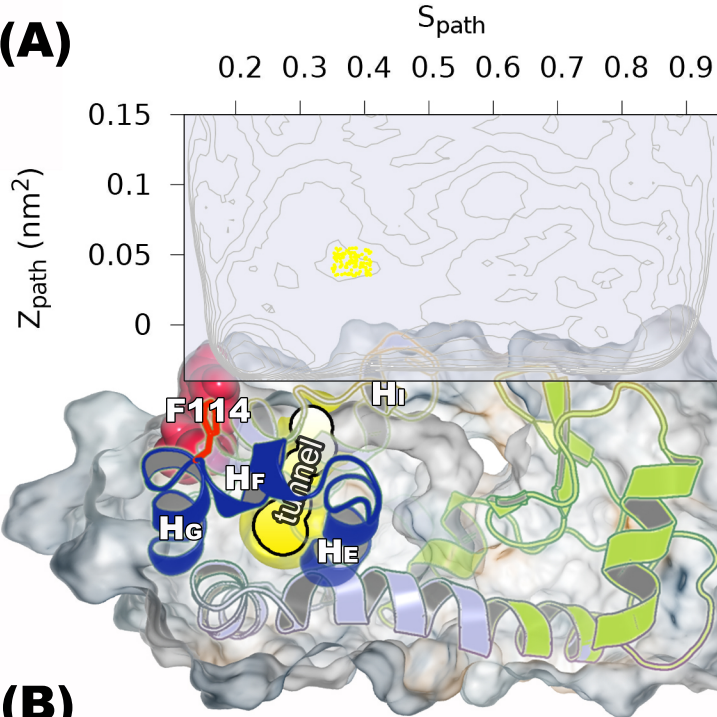**(B)****(C)**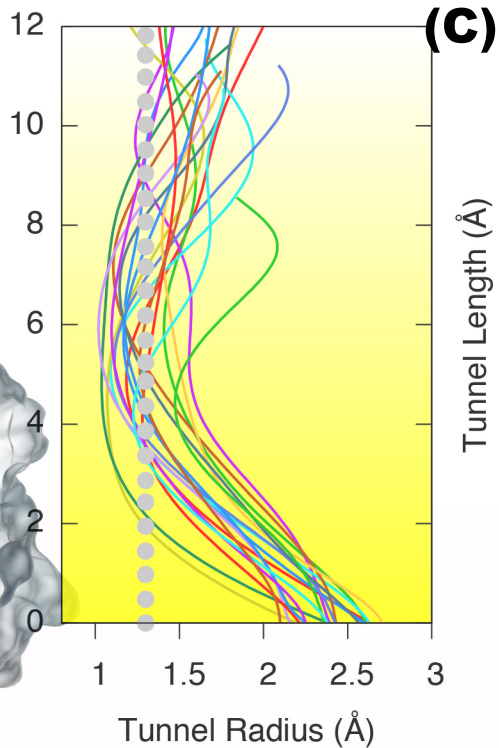

Supplement: supp [file elife_poa_e17505_Figure_6_figure_supplement_1.pdf › elife_poa_e17505_Figure_6_figure_supplement_1.pdf]

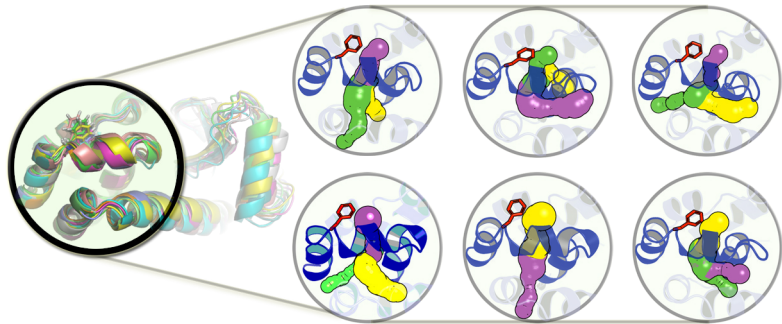

Supplement: supp [file elife_poa_e17505_Figure_6_figure_supplement_2.pdf › elife_poa_e17505_Figure_6_figure_supplement_2.pdf]

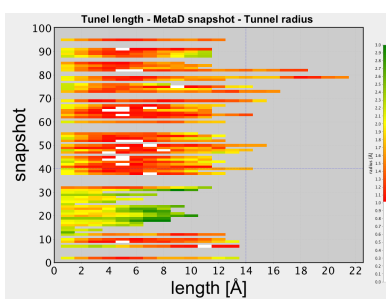

(A) heat map

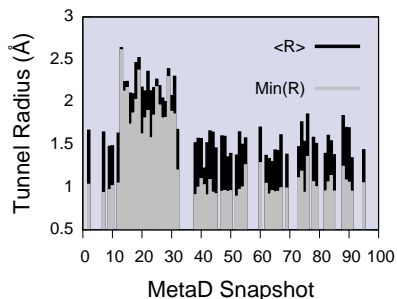

(B) Radius

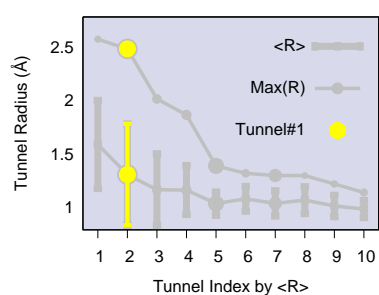

(C)

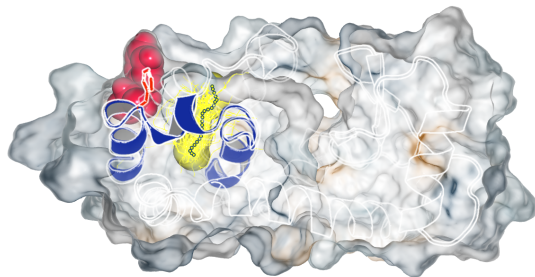

(D) InMetaD

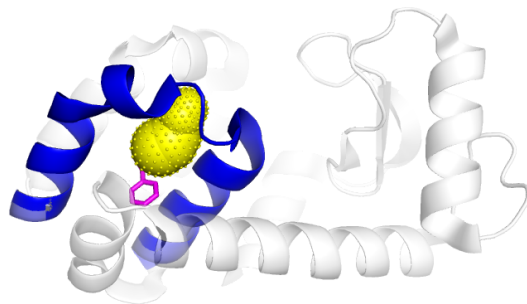

(E) PDB:4W59

Supplement: supp [file elife_poa_e17505_Figure_6_figure_supplement_3.pdf › elife_poa_e17505_Figure_6_figure_supplement_3.pdf]

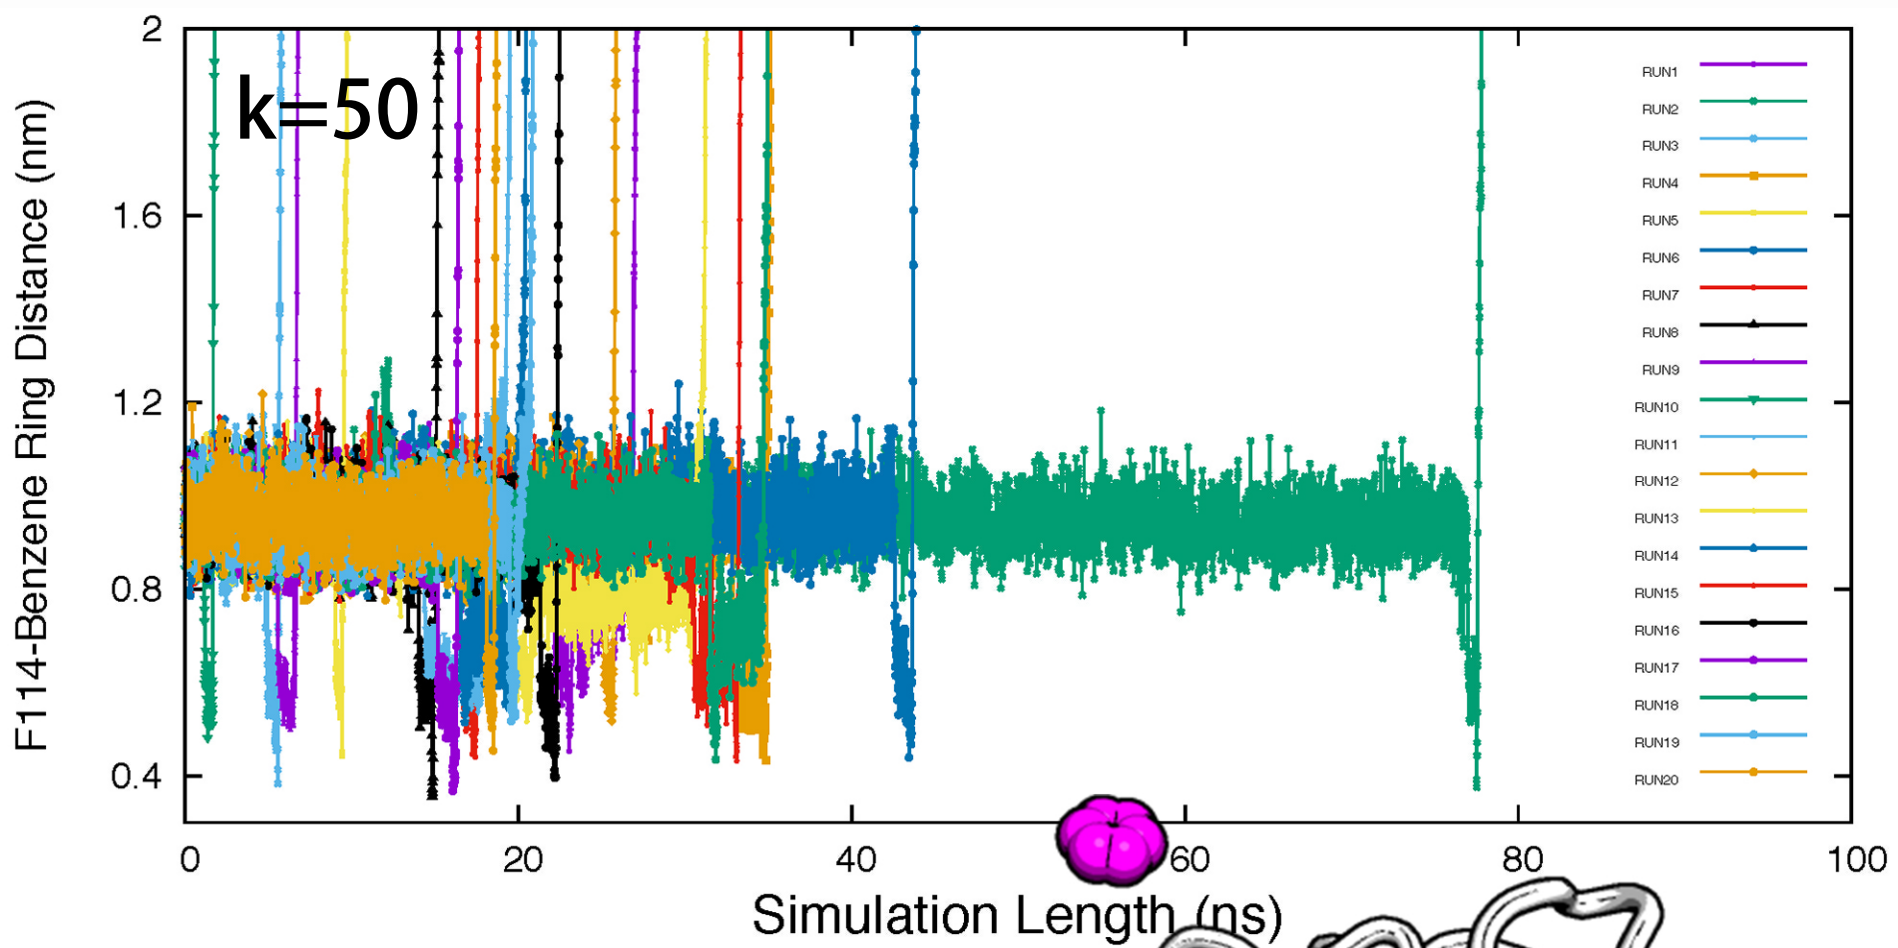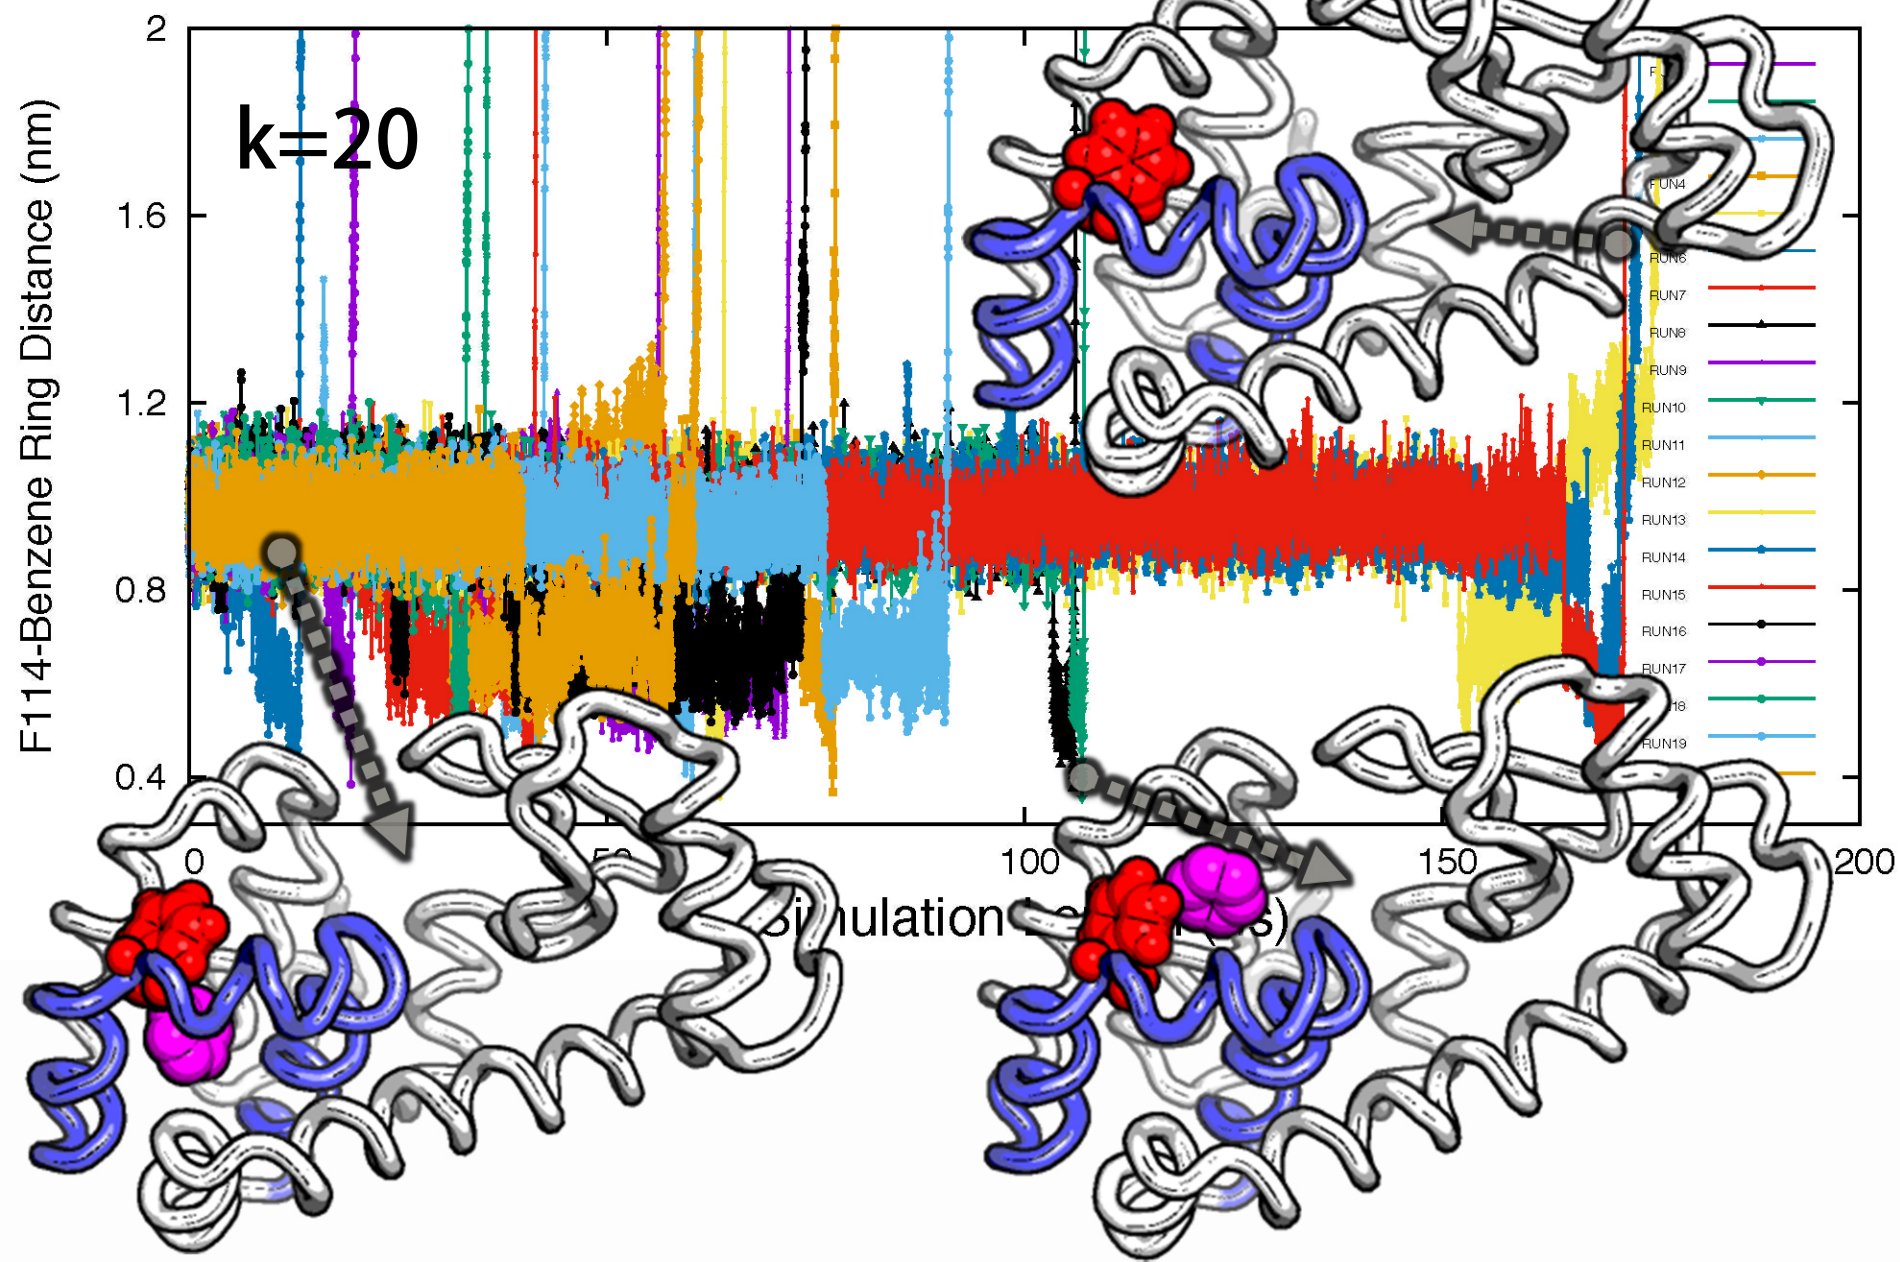

Supplement: supp [file elife_poa_e17505_Figure_6_figure_supplement_4.pdf › elife_poa_e17505_Figure_6_figure_supplement_4.pdf]
